# Supplementary material for: Beneficial Fatty Acid Ratio of Salvia hispanica L. (Chia Seed) Potentially Inhibits Adipocyte Hypertrophy, and Decreases Adipokines Expression and Inflammation in Macrophage
Source: MDPI journal article supplement (doi:10.3390/foods9030368), 2020-03-22
Supplement: s1 [file s1]

File :C:\msdchem\1\data\2016\July-16\30-07-16\E-C-260-07P.D  
Operator :  
Acquired : 30 Jul 2016 18:17 using AcqMethod FATTYACIDCOMPOSITION\_PROCESSING.M  
Instrument : GCMS  
Sample Name: Chia  
Misc Info :  
Vial Number: 2

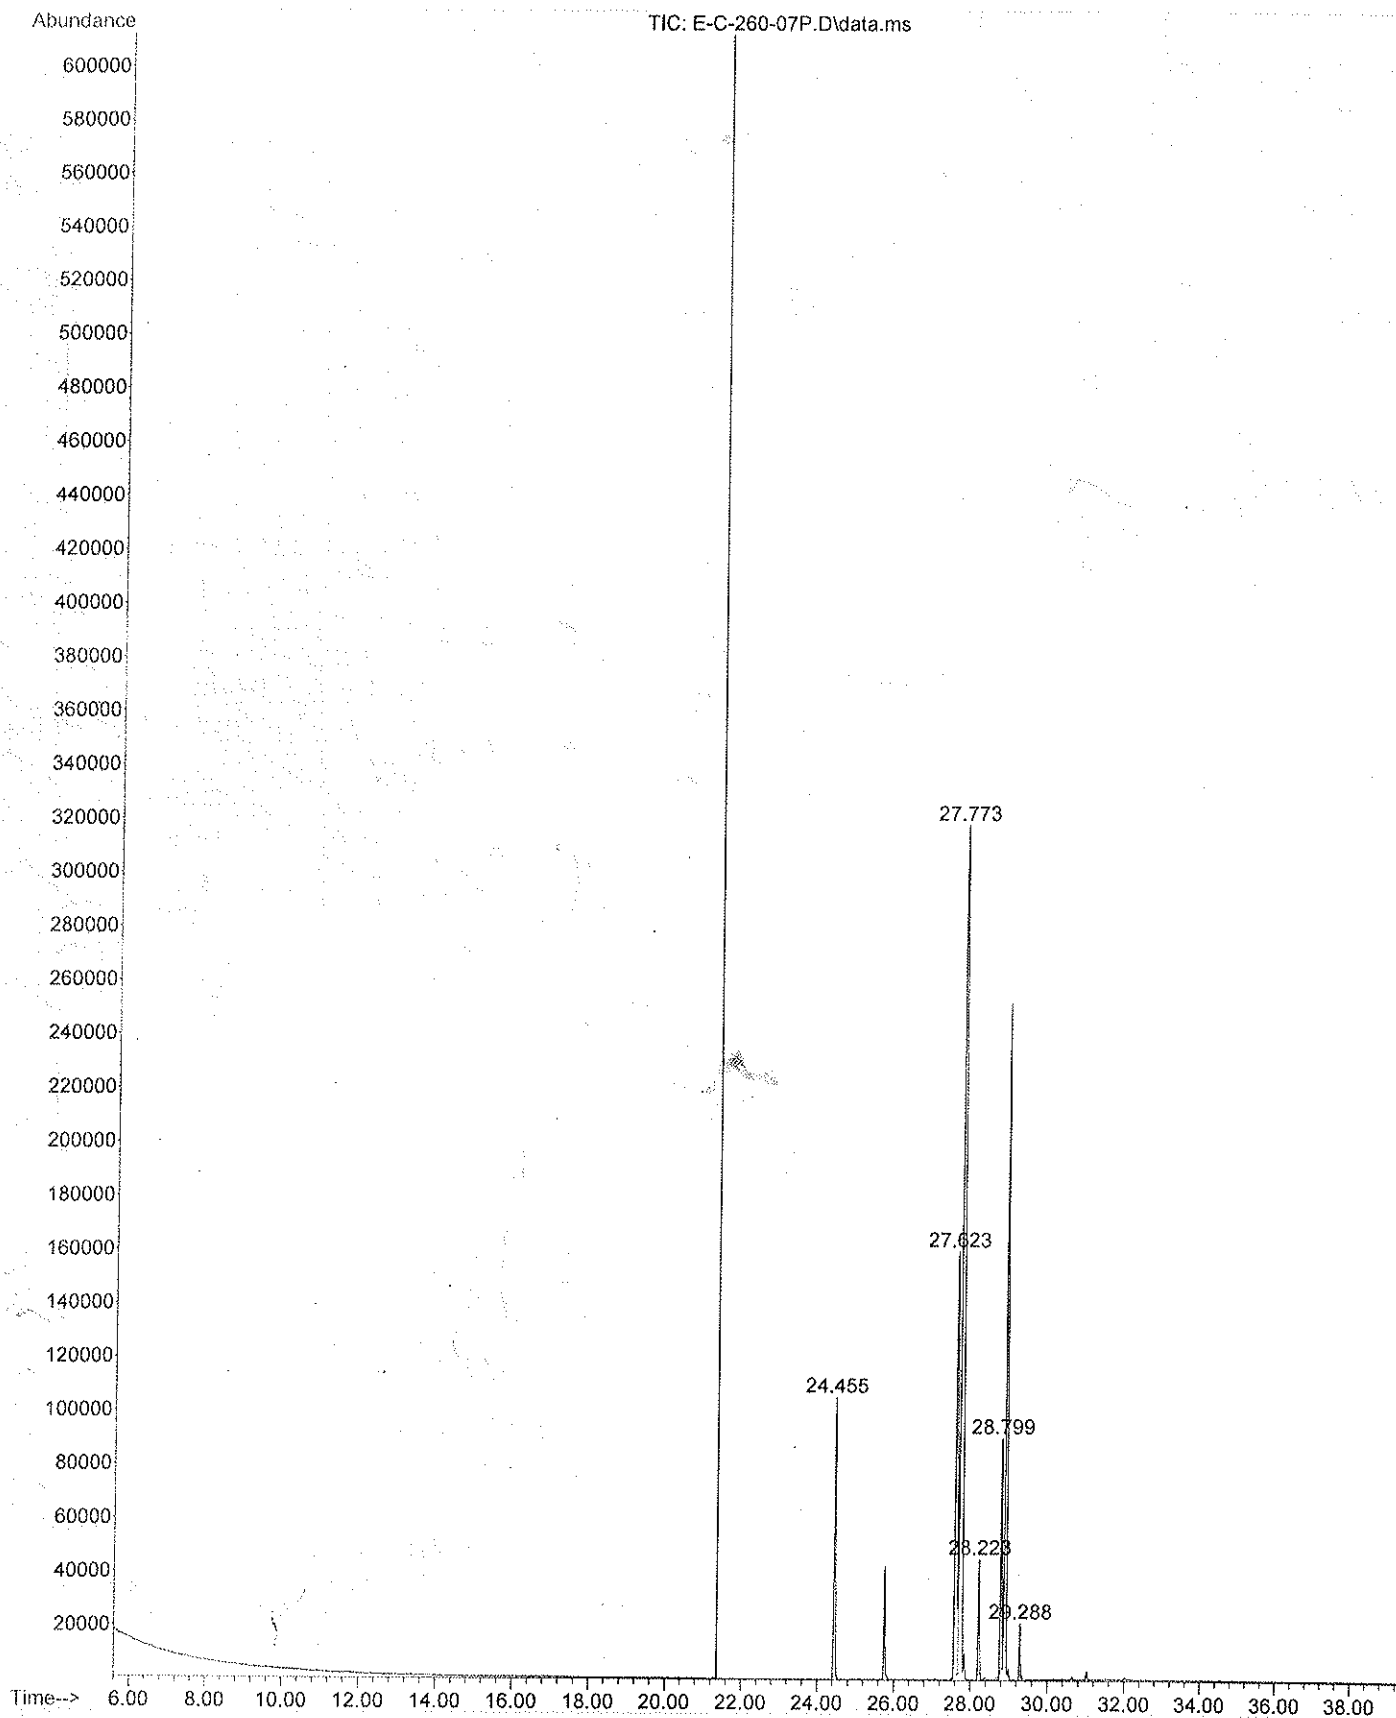

## Library Search Report

Data Path : C:\msdchem\1\data\2016\July-16\30-07-16\  
Data File : E-C-260-07P.D  
Acq On : 30 Jul 2016 18:17  
Operator :  
Sample : Chia  
Misc :  
ALS Vial : 2 Sample Multiplier: 1

Search Libraries: C:\Database\NIST11.L Minimum Quality: 0

Unknown Spectrum: Apex

Integration Events: ChemStation Integrator - E-C-260-07P.E

| PK# | RT     | Area% | Library/ID                                                | Ref#   | CAS#         | Qual |
|-----|--------|-------|-----------------------------------------------------------|--------|--------------|------|
| 1   | 24.457 | 9.49  | C:\Database\NIST11.L                                      |        |              |      |
|     |        |       | Hexadecanoic acid, methyl ester                           | 119400 | 000112-39-0  | 97   |
|     |        |       | Hexadecanoic acid, methyl ester                           | 119405 | 000112-39-0  | 97   |
|     |        |       | Pentadecanoic acid, 14-methyl-, me<br>thyl ester          | 119423 | 005129-60-2  | 97   |
| 2   | 27.623 | 21.35 | C:\Database\NIST11.L                                      |        |              |      |
|     |        |       | 9,12-Octadecadienoic acid, methyl<br>ester                | 139708 | 002462-85-3  | 99   |
|     |        |       | 9,12-Octadecadienoic acid (Z,Z)-,<br>methyl ester         | 139726 | 000112-63-0  | 99   |
|     |        |       | Methyl 10-trans,12-cis-octadecadie<br>noate               | 139709 | 1000336-44-2 | 99   |
| 3   | 27.773 | 56.16 | C:\Database\NIST11.L                                      |        |              |      |
|     |        |       | 9,12,15-Octadecatrienoic acid, met<br>hyl ester, (Z,Z,Z)- | 138095 | 000301-00-8  | 99   |
|     |        |       | 7,10,13-Hexadecatrienoic acid, met<br>hyl ester           | 114197 | 056554-30-4  | 95   |
|     |        |       | 7,10,13-Hexadecatrienoic acid, met<br>hyl ester           | 114196 | 056554-30-4  | 91   |
| 4   | 28.222 | 3.94  | C:\Database\NIST11.L                                      |        |              |      |
|     |        |       | Methyl stearate                                           | 143131 | 000112-61-8  | 98   |
|     |        |       | Methyl stearate                                           | 143126 | 000112-61-8  | 98   |
|     |        |       | Methyl stearate                                           | 143129 | 000112-61-8  | 98   |
| 5   | 28.800 | 7.56  | C:\Database\NIST11.L                                      |        |              |      |
|     |        |       | Linoleic acid ethyl ester                                 | 151450 | 000544-35-4  | 99   |
|     |        |       | 9,12-Octadecadienoic acid, ethyl e<br>ster                | 151471 | 007619-08-1  | 99   |
|     |        |       | 9,12-Octadecadienoic acid (Z,Z)-                          | 127648 | 000060-33-3  | 91   |
| 6   | 29.287 | 1.51  | C:\Database\NIST11.L                                      |        |              |      |
|     |        |       | Heptadecanoic acid, ethyl ester                           | 143161 | 014010-23-2  | 87   |
|     |        |       | Heptadecanoic acid, ethyl ester                           | 143163 | 014010-23-2  | 83   |
|     |        |       | Octadecanoic acid, ethyl ester                            | 154935 | 000111-61-5  | 83   |

## Library Search Report

Data Path : C:\msdchem\1\data\2016\July-16\30-07-16\  
Data File : E-C-260-07P.D  
Acq On : 30 Jul 2016 18:17  
Operator :  
Sample : Chia  
Misc :  
ALS Vial : 2 Sample Multiplier: 1

Search Libraries: C:\Database\NIST11.L

Minimum Quality: 0

Unknown Spectrum: Apex

Integration Events: ChemStation Integrator - E-C-260-07P.E

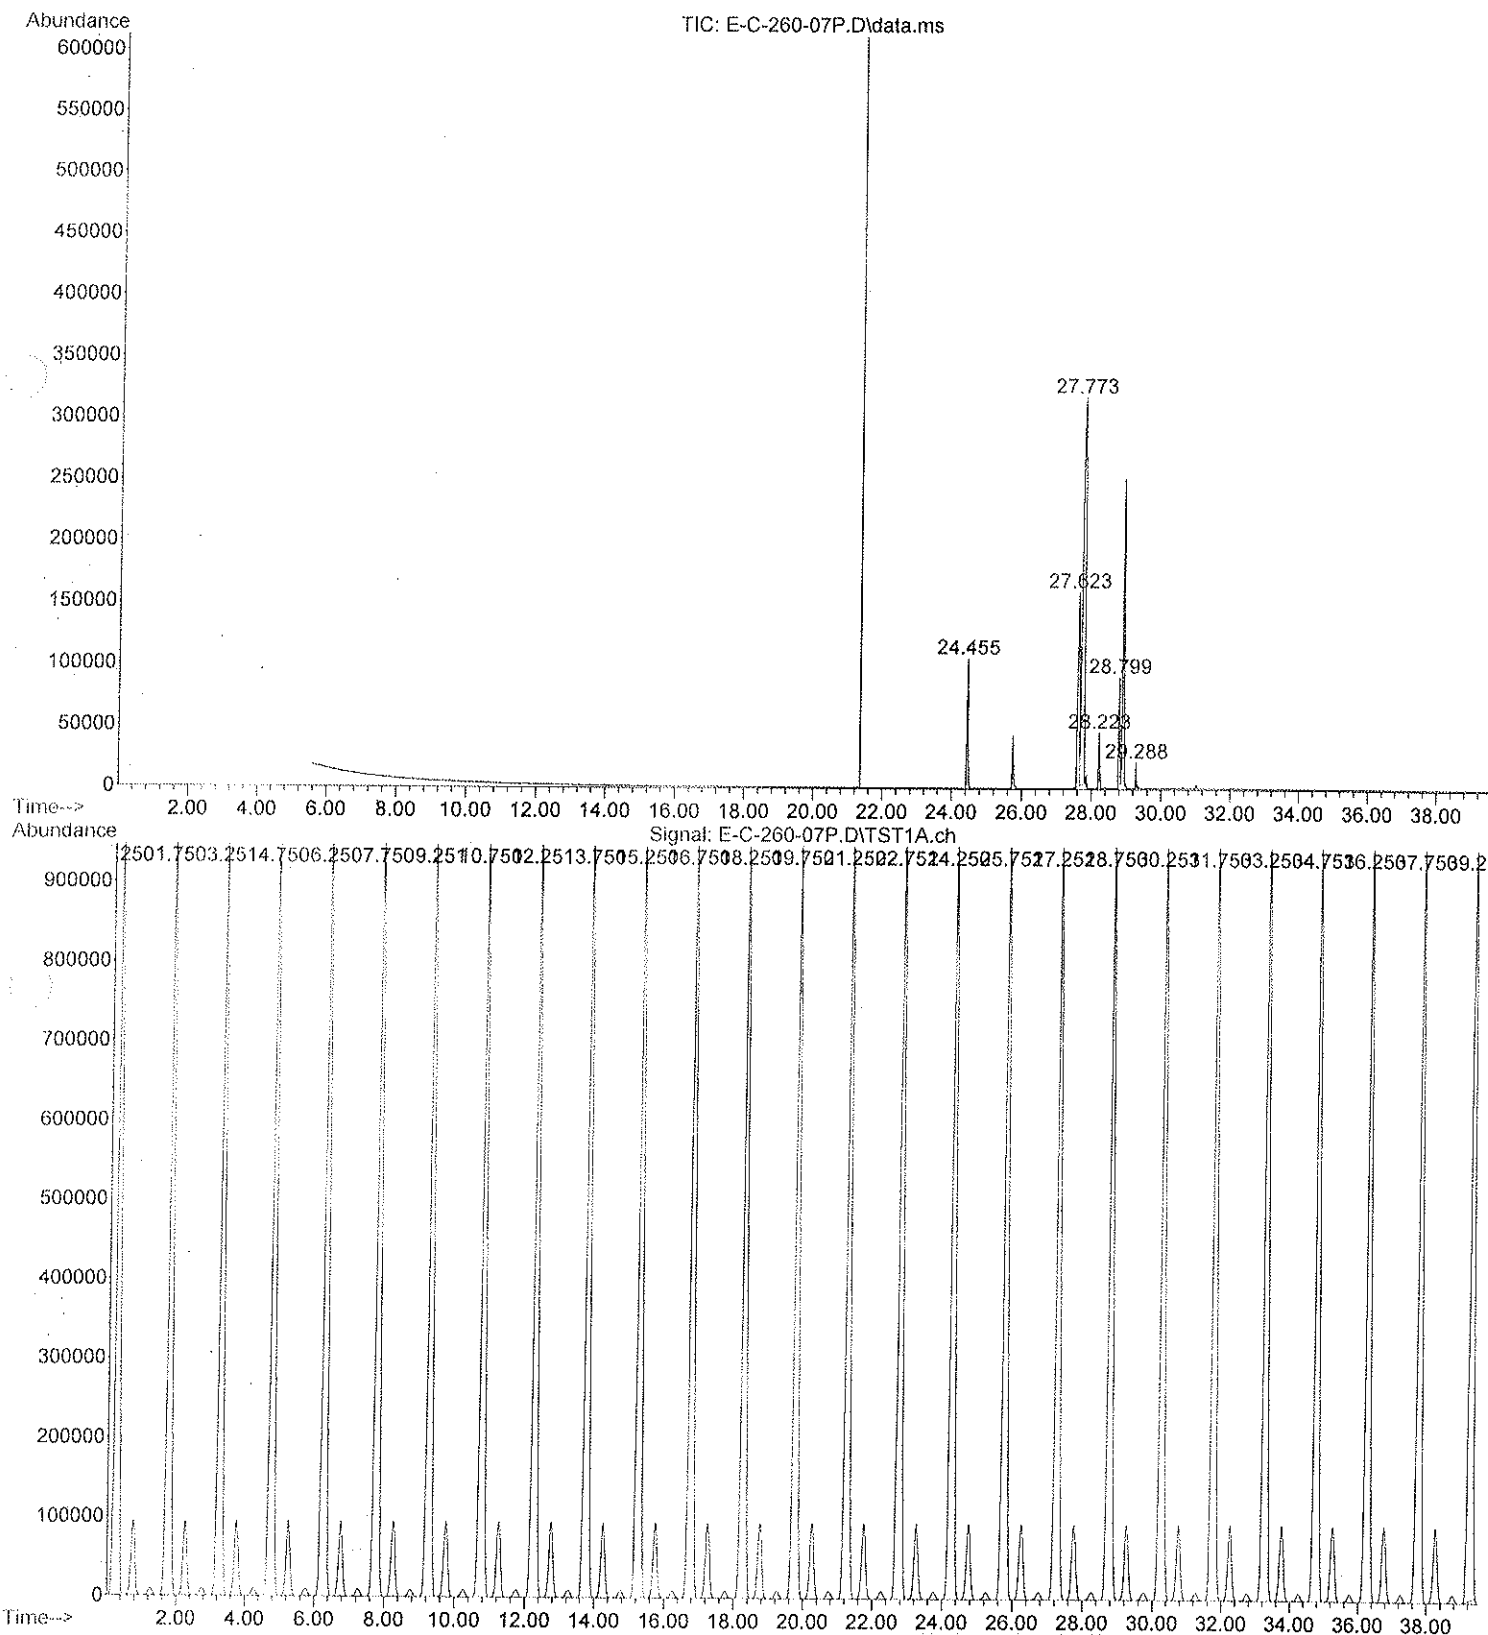

## Unknown Spectrum based on Apex

Abundance Scan 3528 (24.457 min): E-C-260-07P.D\data.ms

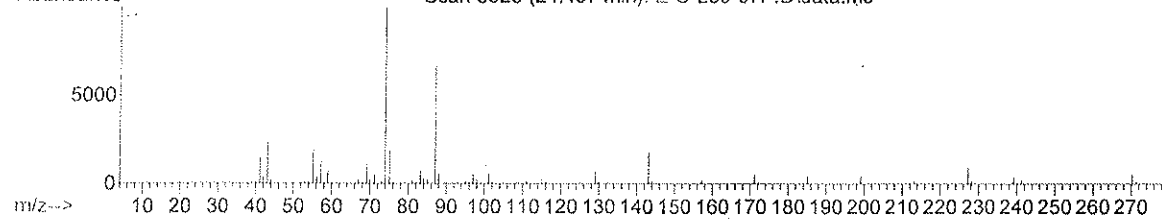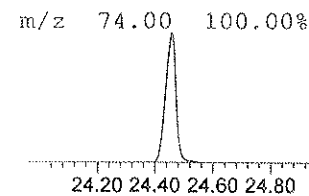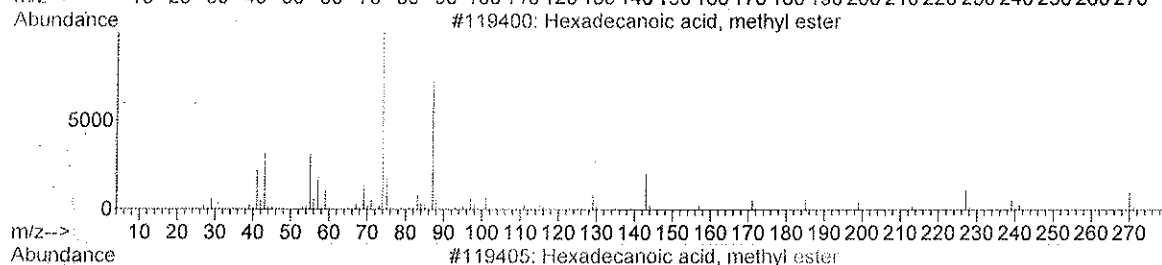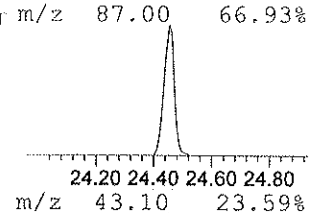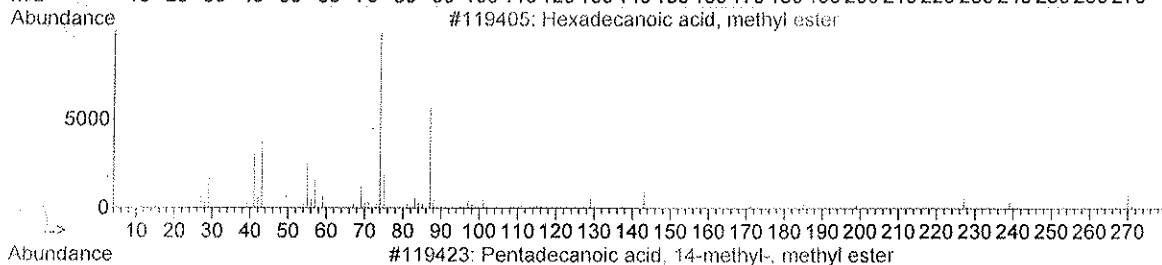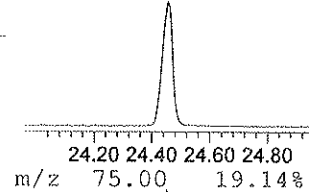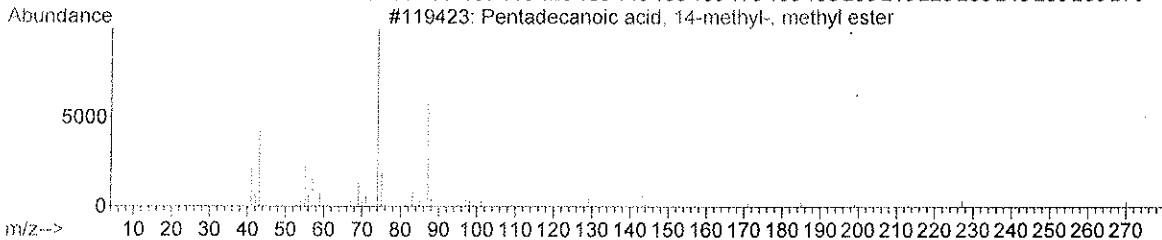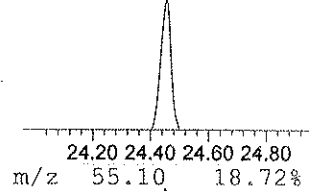

Data File: C:\msdchem\1\data\2016\July-16\30-07-16\E-C-260-07P.D

Sample : Chia

Peak Number: 1 at 24.457 min Area: 2556692 Area % 9.49

The 3 best hits from each library.

Ref\# CAS\# Qual

C:\Database\NIST11.L

|                                       |        |             |    |
|---------------------------------------|--------|-------------|----|
| 1 Hexadecanoic acid, methyl ester     | 119400 | 000112-39-0 | 97 |
| 2 Hexadecanoic acid, methyl ester     | 119405 | 000112-39-0 | 97 |
| 3 Pentadecanoic acid, 14-methyl-, ... | 119423 | 005129-60-2 | 97 |

## Unknown Spectrum based on Apex

Abundance

Scan 4120 (27.623 min): E-C-260-07P.D\data.ms

m/z 67.10 100.00%

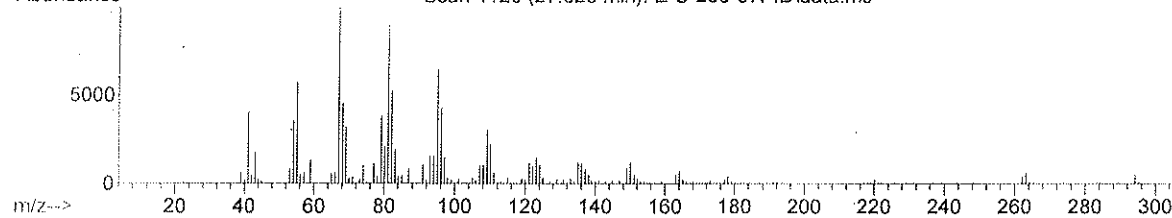

27.40 27.60 27.80 28.00

m/z 81.10 91.88%

Abundance

#139708: 9,12-Octadecadienoic acid, methyl ester

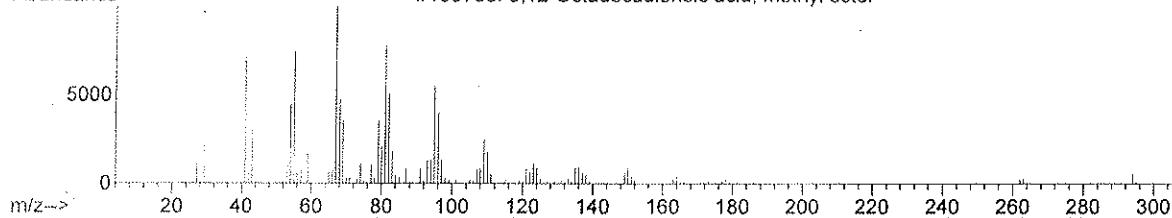

27.40 27.60 27.80 28.00

m/z 95.10 65.00%

Abundance

#139726: 9,12-Octadecadienoic acid (Z,Z)-, methyl ester

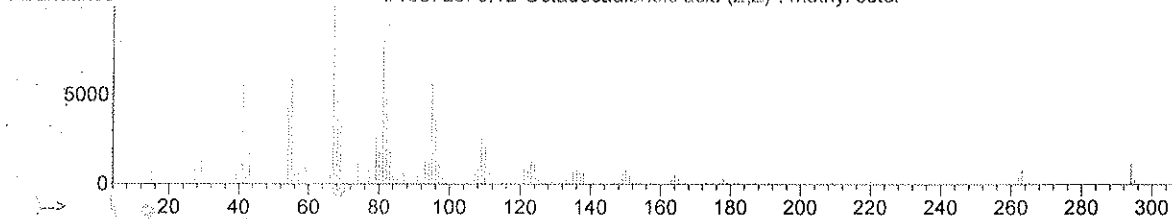

27.40 27.60 27.80 28.00

m/z 55.10 57.28%

Abundance

#139709: Methyl 10-trans,12-cis-octadecadienoate

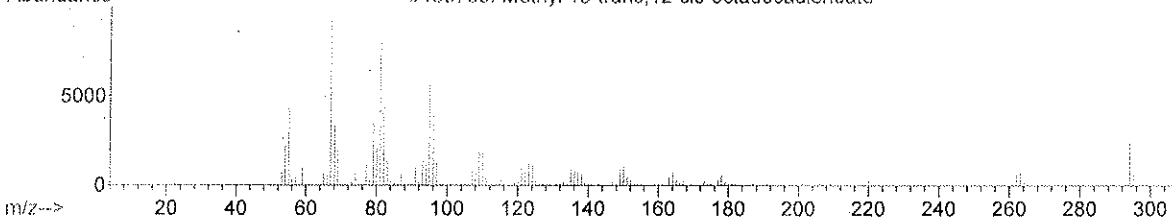

27.40 27.60 27.80 28.00

m/z 82.10 52.73%

Data File: C:\msdchem\1\data\2016\July-16\30-07-16\E-C-260-07P.D

Sample : Chia

Peak Number: 2 at 27.623 min Area: 5752494 Area % 21.35

The 3 best hits from each library.

Ref\#

CAS\#

Qual

C:\Database\NIST11.L

|   |                                     |        |              |    |
|---|-------------------------------------|--------|--------------|----|
| 1 | 9,12-Octadecadienoic acid, methy... | 139708 | 002462-85-3  | 99 |
| 2 | 9,12-Octadecadienoic acid (Z,Z)-... | 139726 | 000112-63-0  | 99 |
| 3 | Methyl 10-trans,12-cis-octadecad... | 139709 | 1000336-44-2 | 99 |

## Unknown Spectrum based on Apex

Abundance

Scan 4148 (27.773 min): E-C-260-07P.D\data.ms

m/z 79.10 100.00%

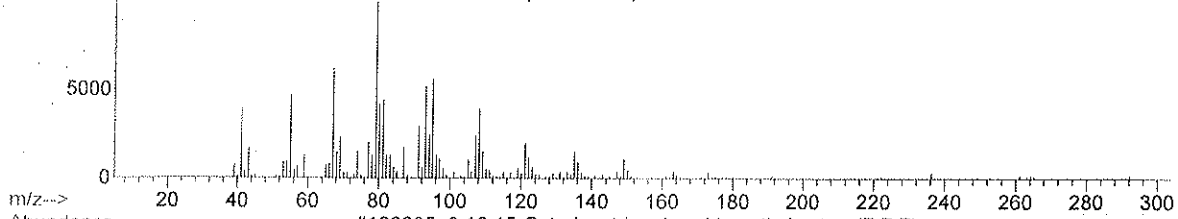

m/z 67.10 62.22%

Abundance

#138095: 9,12,15-Octadecatrienoic acid, methyl ester, (Z,Z,Z)-

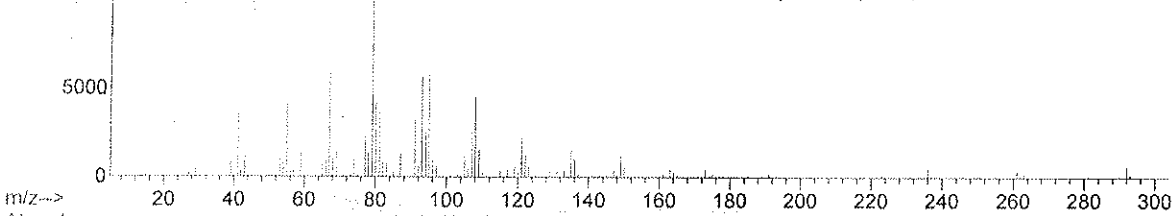

m/z 95.10 56.15%

Abundance

#114197: 7,10,13-Hexadecatrienoic acid, methyl ester

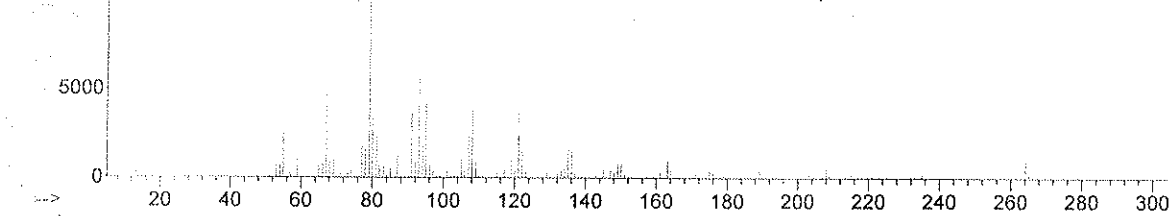

m/z 93.10 52.24%

Abundance

#114196: 7,10,13-Hexadecatrienoic acid, methyl ester

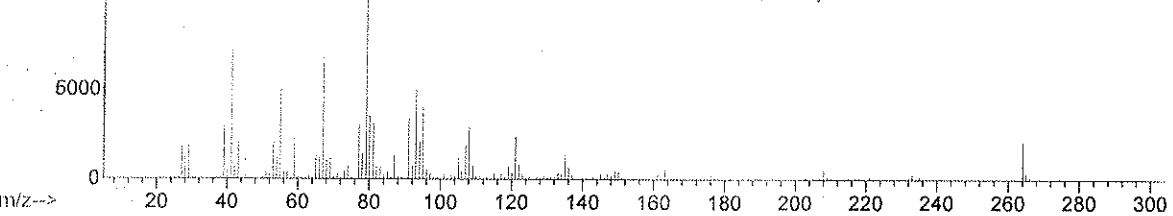

m/z 55.10 46.73%

Data File: C:\msdchem\1\data\2016\July-16\30-07-16\E-C-260-07P.D

Sample : Chia

Peak Number: 3 at 27.773 min Area: 15132970 Area % 56.16

The 3 best hits from each library.

Ref\#

CAS\#

Qual

C:\Database\NIST11.L

|   |                                     |        |             |    |
|---|-------------------------------------|--------|-------------|----|
| 1 | 9,12,15-Octadecatrienoic acid, m... | 138095 | 000301-00-8 | 99 |
| 2 | 7,10,13-Hexadecatrienoic acid, m... | 114197 | 056554-30-4 | 95 |
| 3 | 7,10,13-Hexadecatrienoic acid, m... | 114196 | 056554-30-4 | 91 |

Unknown Spectrum based on Apex

Abundance Scan 4232 (28.222 min): E-C-260-07P.D\data.ms

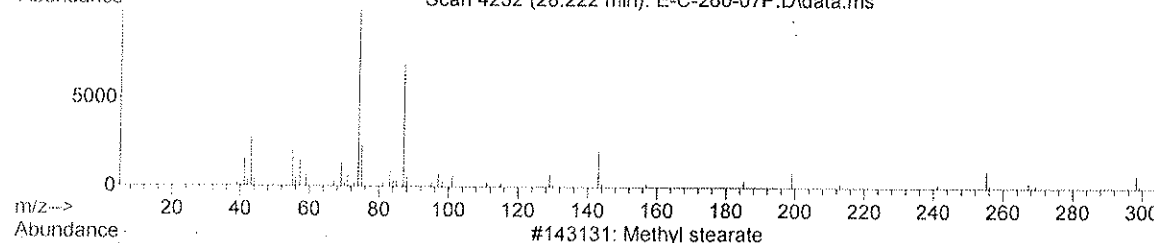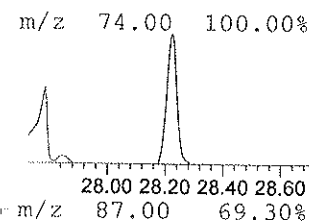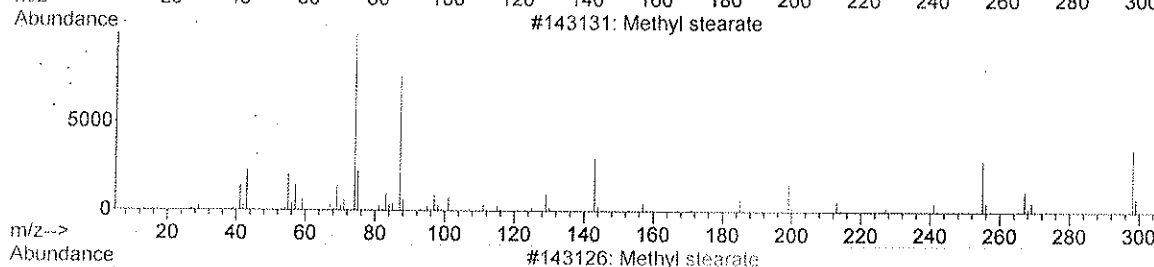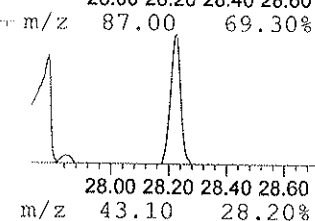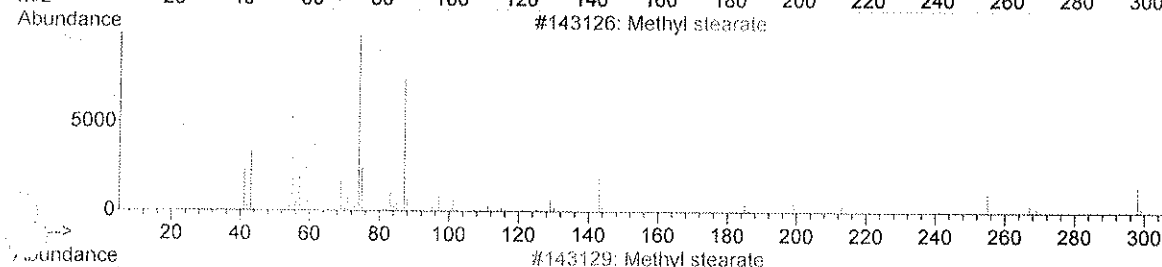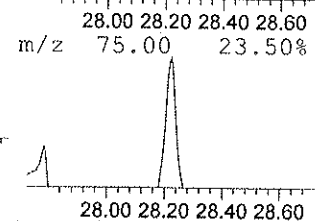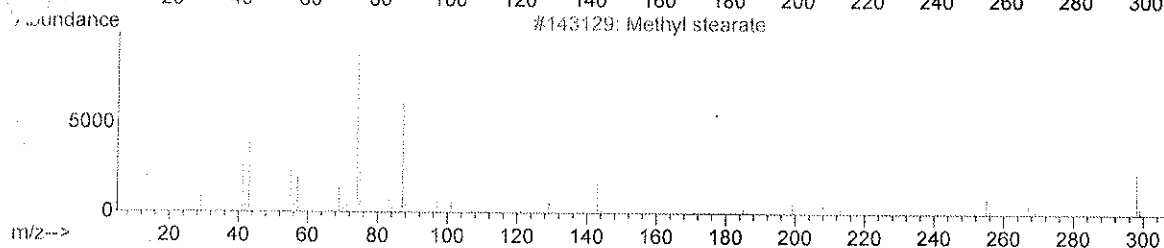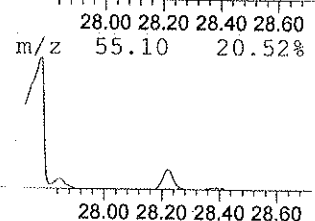

Data File: C:\msdchem\1\data\2016\July-16\30-07-16\E-C-260-07P.D

Sample : Chia

Peak Number: 4 at 28.222 min Area: 1060675 Area % 3.94

The 3 best hits from each library.

Ref\# CAS\# Qual

C:\Database\NIST11.L

|                   |        |             |    |
|-------------------|--------|-------------|----|
| 1 Methyl stearate | 143131 | 000112-61-8 | 98 |
| 2 Methyl stearate | 143126 | 000112-61-8 | 98 |
| 3 Methyl stearate | 143129 | 000112-61-8 | 98 |

## Unknown Spectrum based on Apex

Abundance Scan 4340 (28.800 min): E-C-260-07P.D\data.ms

m/z 67.10 100.00%

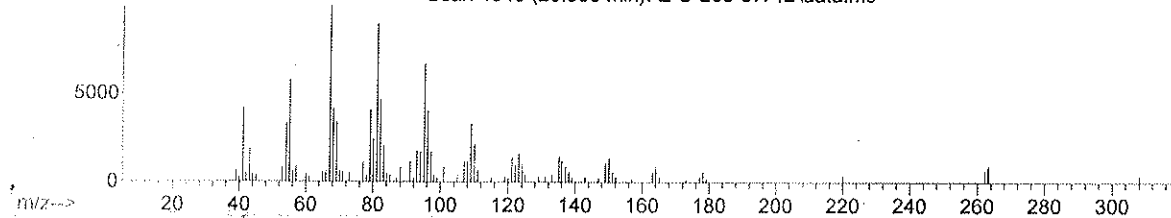

m/z 81.10 90.44%

m/z 95.10 66.82%

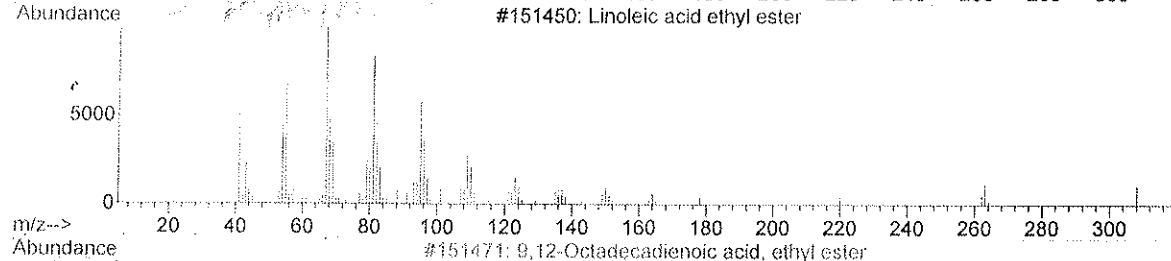

m/z 81.10 90.44%

m/z 95.10 66.82%

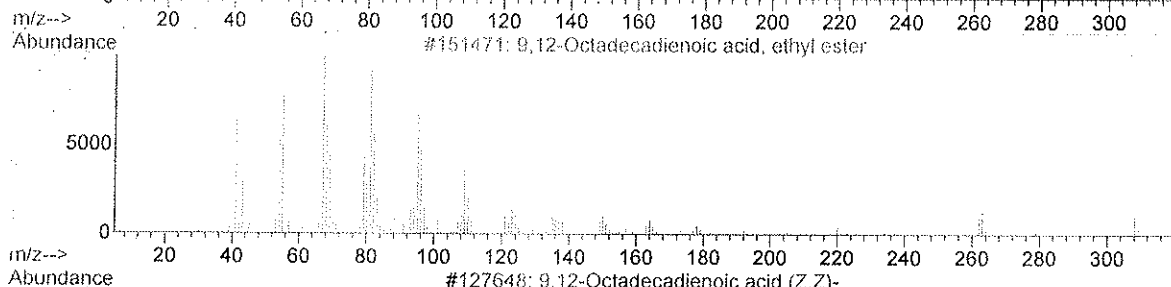

m/z 81.10 90.44%

m/z 95.10 66.82%

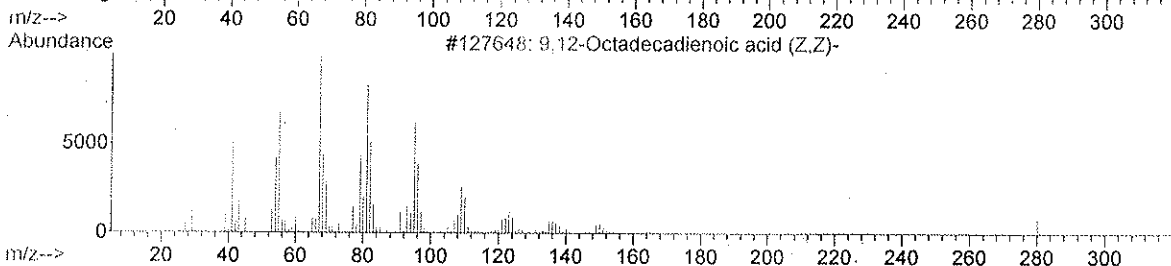

m/z 81.10 90.44%

m/z 95.10 66.82%

Data File: C:\msdchem\1\data\2016\July-16\30-07-16\E-C-260-07P.D

Sample : Chia

Peak Number: 5 at 28.800 min Area: 2036278 Area % 7.56

The 3 best hits from each library.

Ref\# CAS\# Qual

C:\Database\NIST11.L

|   |                                     |        |             |    |
|---|-------------------------------------|--------|-------------|----|
| 1 | Linoleic acid ethyl ester           | 151450 | 000544-35-4 | 99 |
| 2 | 9,12-Octadecadienoic acid, ethyl... | 151471 | 007619-08-1 | 99 |
| 3 | 9,12-Octadecadienoic acid (Z,Z)-    | 127648 | 000060-33-3 | 91 |



Unknown Spectrum based on Apex

Scan 4431 (29.287 min): E-C-260-07P.D\data.ms

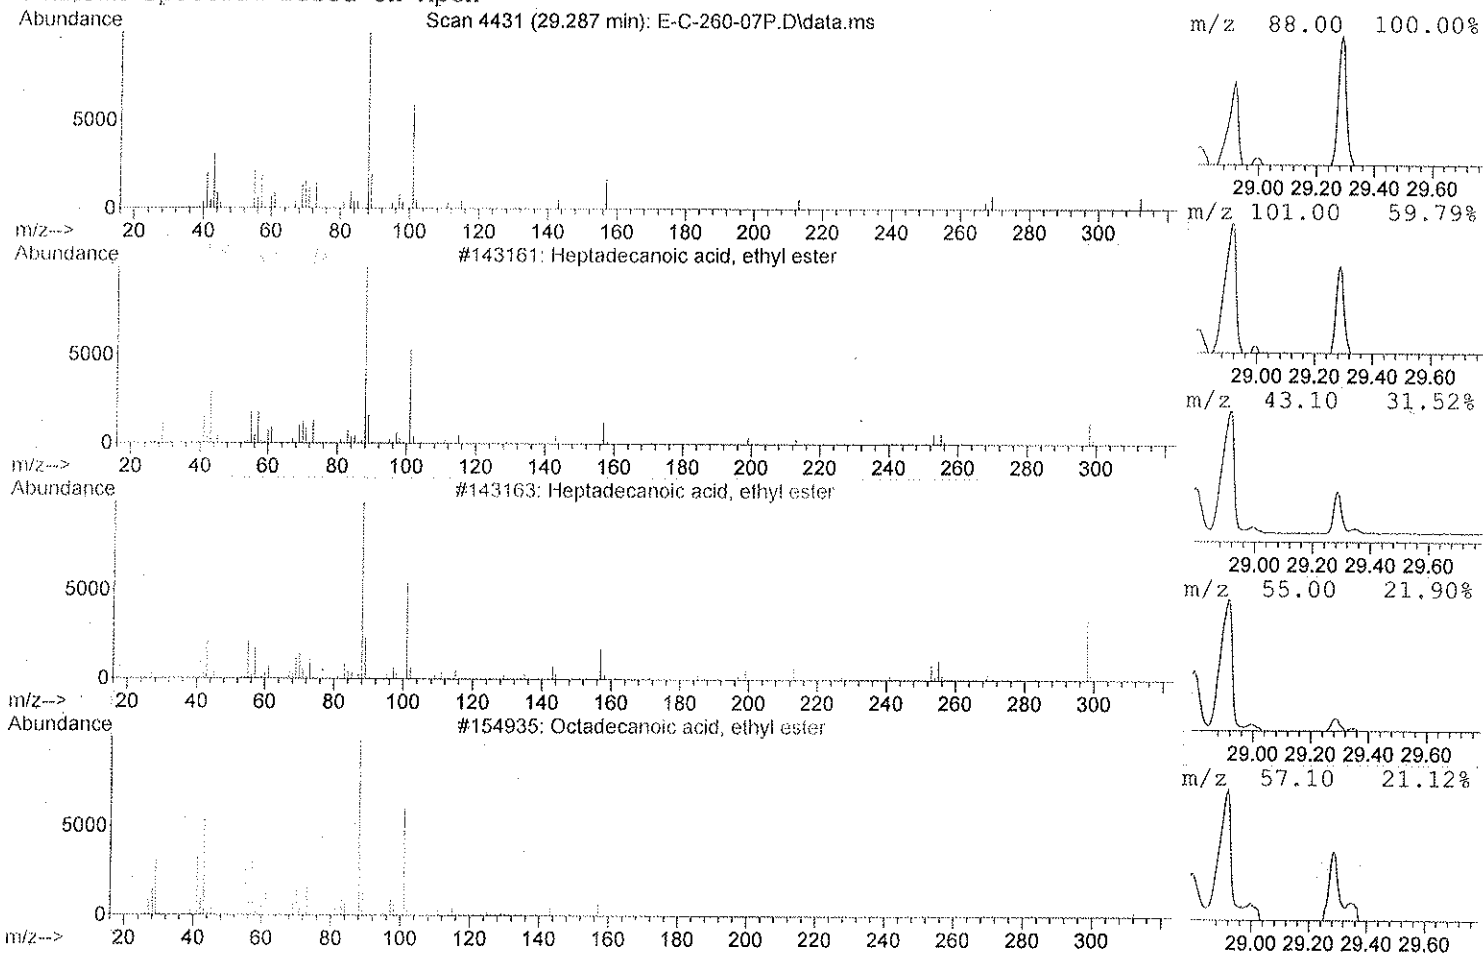

Data File: C:\msdchem\1\data\2016\July-16\30-07-16\E-C-260-07P.D

Sample: Chia

Peak Number: 6 at 29.287 min Area: 405825 Area % 1.51

The 3 best hits from each library.

Ref\# CAS\# Qual

C:\Database\NIST11.L

|   |                                 |        |             |    |
|---|---------------------------------|--------|-------------|----|
| 1 | Heptadecanoic acid, ethyl ester | 143161 | 014010-23-2 | 87 |
| 2 | Heptadecanoic acid, ethyl ester | 143163 | 014010-23-2 | 83 |
| 3 | Octadecanoic acid, ethyl ester  | 154935 | 000111-61-5 | 83 |
